# Supplementary material
Source: PubMed Central journal article supplement (PMC10076949)
Supplement: noac219_suppl_supplementary_figure_s1.pdf [file noac219_suppl_supplementary_figure_s1.pdf]

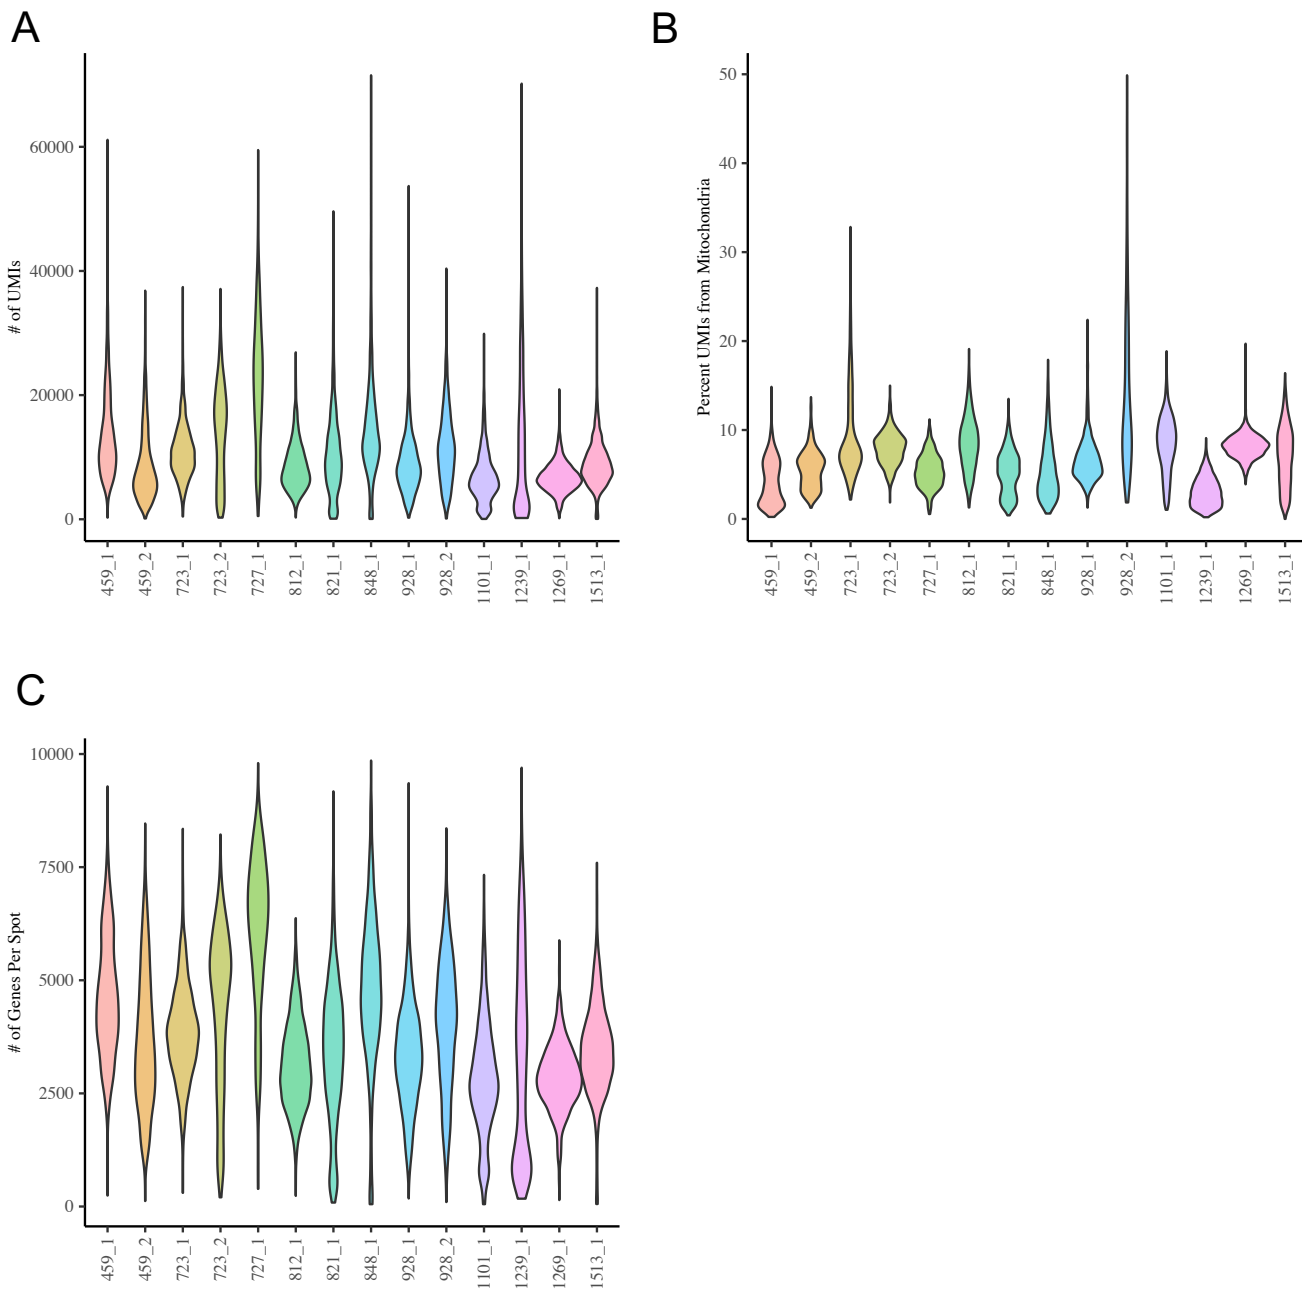

**Supplementary figure 1. Quality control of Visium spatial transcriptomic data.**

**A**, Post-filtering number of unique molecular identifiers (UMI) per cell and sample. **B**, percent mitochondrial reads per cell and sample. **C**, number of genes per cell per sample
