# Supplementary material
Source: PubMed Central journal article supplement (PMC10076949)
Supplement: noac219_suppl_supplementary_figure_s4.pdf [file noac219_suppl_supplementary_figure_s4.pdf]

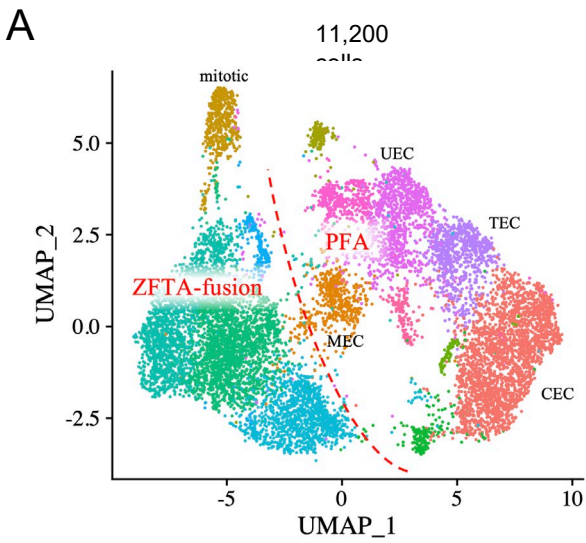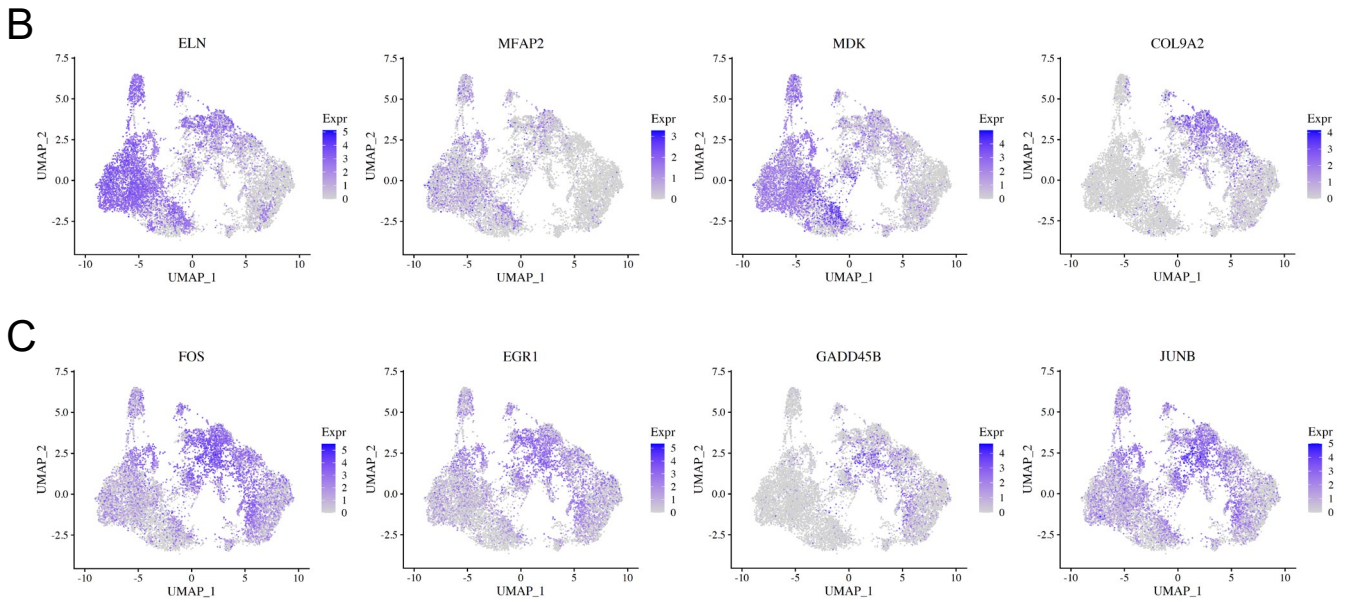

**Supplementary figure 4. Reanalysis of ependymoma scRNAseq data showing UEC-A and UEC-B ST cluster marker gene expression at single cell resolution. A, Reference UMAP projection of neoplastic scRNAseq dataset from 26 EPN patient samples with subgroup and major PFA cell types indicated. UMAP feature plots of top B, UEC-A and C, UEC-B ST cluster marker expression in scRNAseq dataset.**
