# Supplementary material
Source: PubMed Central journal article supplement (PMC10076949)
Supplement: noac219_suppl_supplementary_figure_s6.pdf [file noac219_suppl_supplementary_figure_s6.pdf]

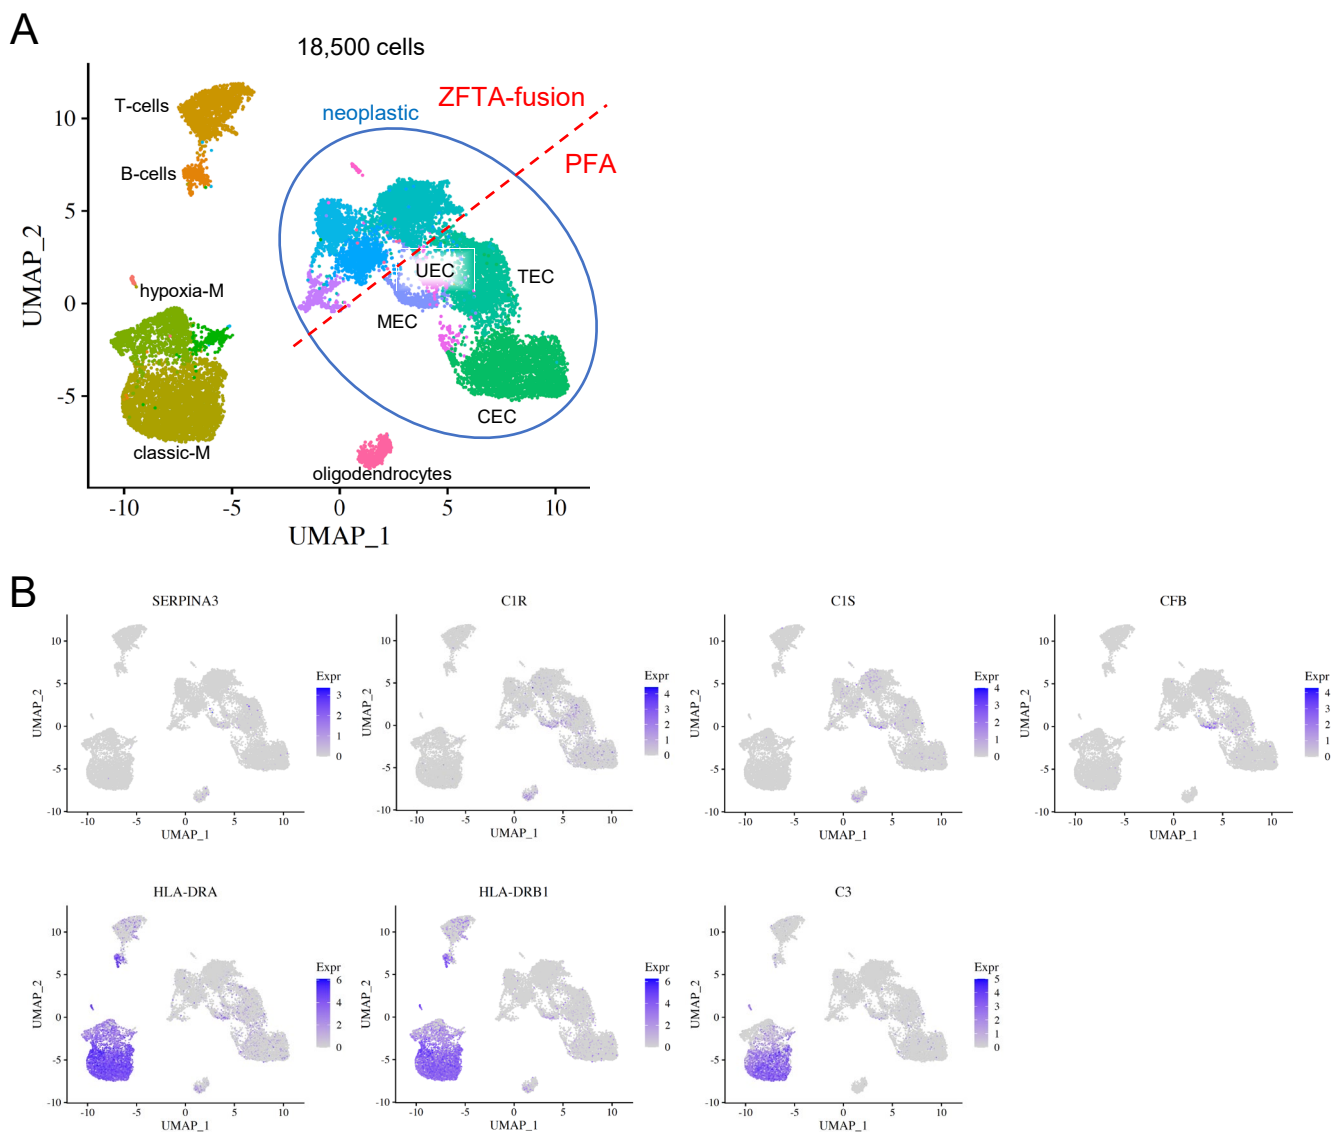

**Supplementary Figure 6. Reanalysis of ependymoma scRNAseq data showing MEC-A ST cluster marker gene expression at single cell resolution. A, Reference UMAP projection of scRNAseq data from 26 EPN patient samples with major cell types and subgroups indicated. B, UMAP feature plots of top MEC-A Visium cluster marker expression in scRNAseq dataset.**
