# Supplementary material
Source: PubMed Central journal article supplement (PMC10076949)
Supplement: noac219_suppl_supplementary_figure_s8.pdf [file noac219_suppl_supplementary_figure_s8.pdf]

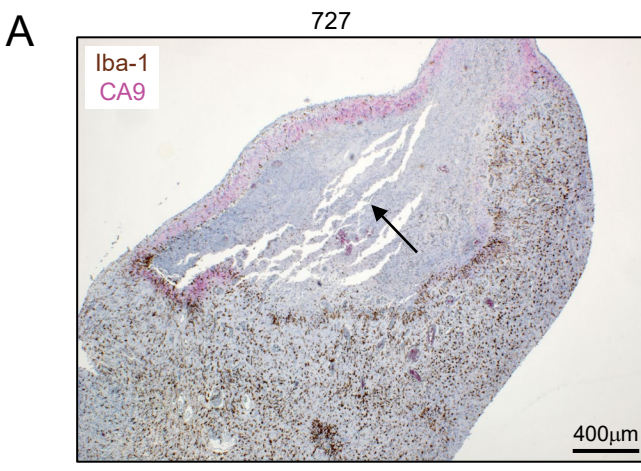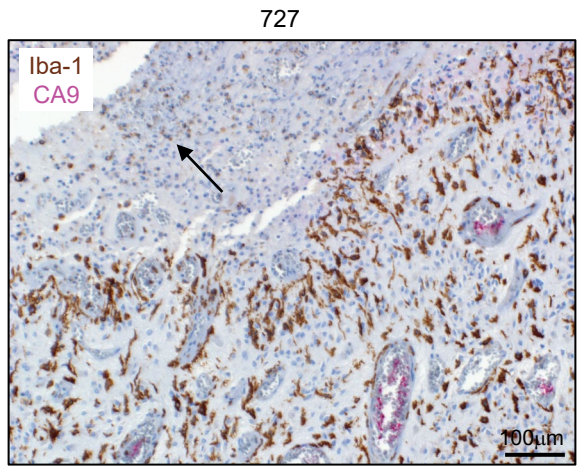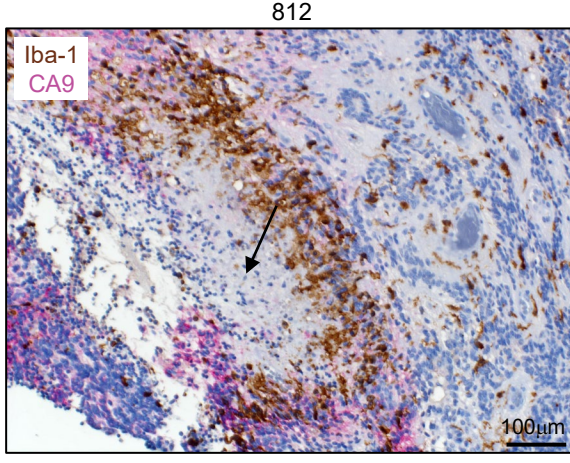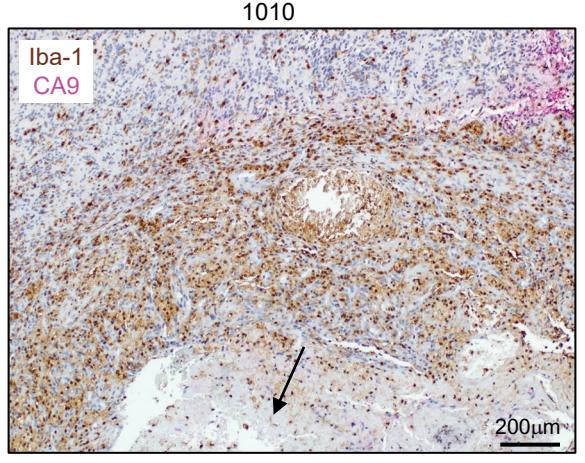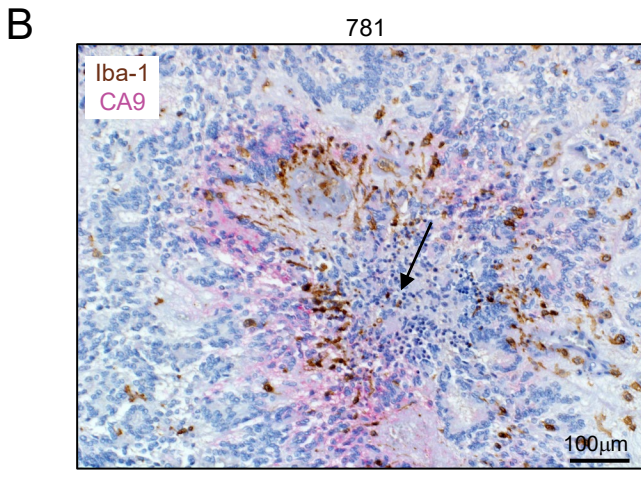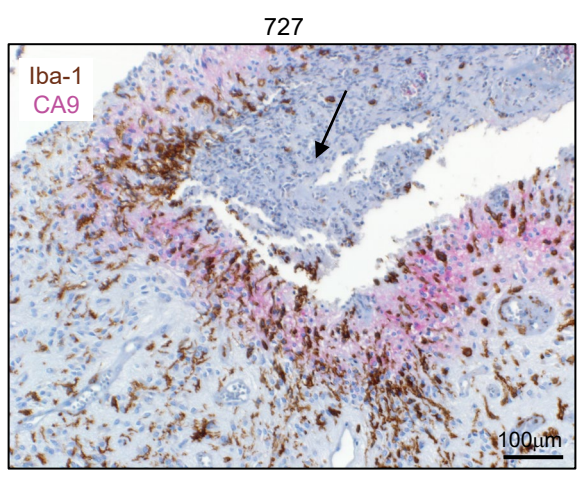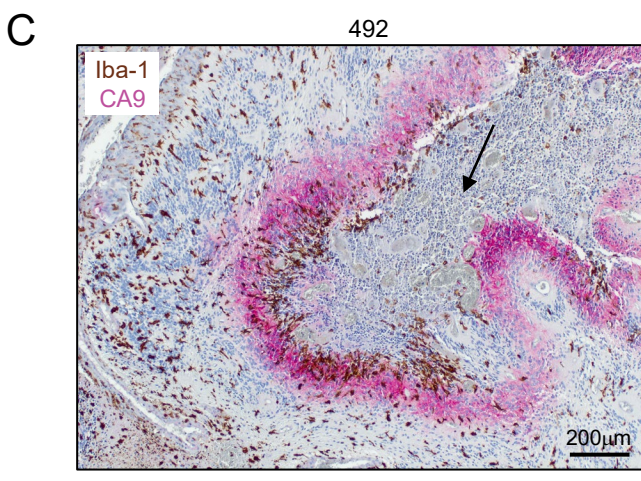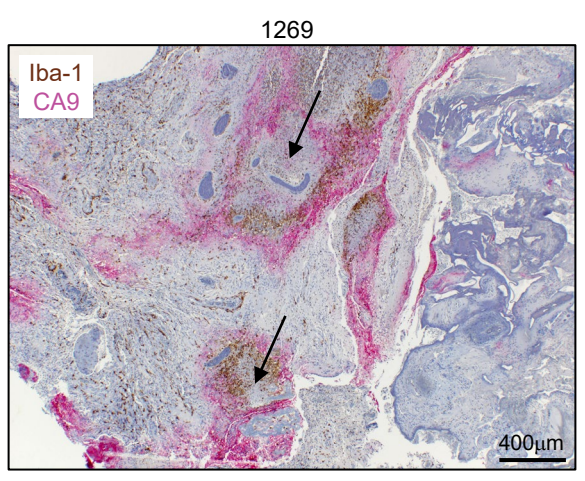

**Supplementary Figure 8. Spatial relationships between myeloid cells, mesenchymal cells and necrotic zones.** Dual IHC for markers of myeloid cells (Iba-1; brown) and MEC zones (CA9; red) in representative PFA samples showing arrangement relative to areas of early and late necrosis (black arrows). **A**, Typical perinecrotic myeloid accumulation in the absence of CA9. **B**, Perinecrotic intermixing of myeloid with CA9+ mesenchymal cells. **C**, Sequential perinecrotic bands of myeloid accumulation and CA9+ mesenchymal cells.
